# Supplementary material
Source: PubMed Central journal article supplement (PMC5313067)
Supplement: jciinsight-2-91454-s001.pdf [file jciinsight-2-91454-s001.pdf]

## Supplemental information

### **Hsp90 Regulation of Fibroblast Activation in Pulmonary Fibrosis**

Vishwaraj Sontake<sup>1,4</sup>, Yunguan Wang<sup>2</sup>, Rajesh K. Kasam<sup>1,4</sup>, Debora Sinner<sup>3</sup>, Geerreddy B. Reddy<sup>4</sup>,  
Anjaparavanda P. Naren<sup>1</sup>, Francis X. McCormack<sup>5</sup>, Eric S. White<sup>6</sup>, Anil G. Jegga<sup>2,\*</sup>, and Satish K. Madala<sup>1,\*</sup>

<sup>1</sup>Division of Pulmonary Medicine, <sup>2</sup>Division of Biomedical Informatics and <sup>3</sup>Division of Neonatology and Pulmonary Biology, Cincinnati Children's Hospital Medical Center, Cincinnati, Ohio USA.

<sup>4</sup>Department of Biochemistry, National Institute of Nutrition, Hyderabad, Telangana, India.

<sup>5</sup>Division of Pulmonary, Critical Care and Sleep Medicine, University of Cincinnati, Cincinnati, Ohio USA.

<sup>6</sup>Department of Internal Medicine, University of Michigan Health System, Ann Arbor, Michigan, USA.

\* Corresponding authors: Dr. Satish K. Madala, Division of Pulmonary Medicine, Cincinnati Children's Hospital Medical Center, 3333 Burnet Avenue, MLC 2021, Cincinnati, OH, 45229, USA Telephone: 513-636-9852 FAX: 513-636-3723. E-mail: [satish.madala@cchmc.org](mailto:satish.madala@cchmc.org)

Dr. Anil G. Jegga, Division of Biomedical informatics, Cincinnati Children's Hospital Medical Center, 240 Albert Sabin Way, MLC 7024, Cincinnati, OH, 45229, USA Telephone: 513-636-0261 FAX: 513-636-2056. E-mail: [anil.jegga@cchmc.org](mailto:anil.jegga@cchmc.org)

Authorship note: A.G.J and A.K. M. are co-senior authors.

Conflict of interest: The authors have declared that no conflict of interest exists.

## Methods

**Human and mouse primary lung fibroblasts cultures.** Human primary lung fibroblast cell cultures were prepared as previously described (1, 2). Lung tissue was collected into DMEM supplemented to contain 10% FBS and 1% each of penicillin, streptomycin, and amphotericin. Each lung-tissue sample was cut into 2 x 2 cm pieces, and each piece was finely minced and digested in 5 ml DMEM containing collagenase (2 mg/ml), incubated at 37°C for 1h. Digested tissues were passed through a 100- $\mu$ m filter, washed twice by centrifugation at 1000 x g for 5 min, plated onto 100-mm tissue culture plates in 10 ml DMEM, and incubated at 37°C, 5% CO<sub>2</sub> to allow the cells to adhere and migrate away from the larger remaining tissue pieces. Unbound cells were removed on Day 2 of culture by washing cells with fresh DMEM. Adherent lung fibroblasts were cultured until confluent (1–2 wk). Similarly, mouse lung tissues were minced and cultured in IMDM supplemented with 5% FBS and 1% each of penicillin, streptomycin as previously described (1).

**Myofibroblast transformation.** To assess the effects of 17-AAG on fibroblast to myofibroblast transformation, primary mouse lung fibroblasts isolated from SMAcreER/ROSA mTmG/+ mice were seeded on to chamber slides at density of  $1 \times 10^5$  for 24h. Cells were serum starved (0.5% FBS) at 70–80% confluency for overnight and then treated with 2 $\mu$ M 4-hydroxytamoxifen (Cat# H7904, sigma-Aldrich, ST. Louis. MO, USA) for 72 h in presence or absence of TGF $\beta$  (20 ng/ml) or 17-AAG (0.2 $\mu$ M). For genetic knockdown studies cells grown on chamber slides were transfected with control or Hsp90AA or Hsp90AB siRNA for 24h, post transfection cells were treated with 2 $\mu$ M 4-hydroxytamoxifen in presence and absence of TGF $\beta$  for additional 72h. After 72h, cells were fixed with 4% paraformaldehyde and the nucleus was stained using prolong gold DAPI. Fluorescence images were collected using a Nikon AIR-A1 laser-scanning confocal microscope (Melville, NY, USA). For quantitation of SMAcreER induced green positive cells, 5-6 random images were taken for each condition (DMSO or TGF $\beta$  or TGF $\beta$  and 17-AAG) with the 10X or 20X objective. Cell quantitation was performed using Metamorph imaging software.

**TGF $\beta$  stimulation and 17-AAG treatment.** To assess the effects of 17-AAG on TGF $\beta$ -induced ECM expression, primary fibroblasts from non-IPF controls were plated in 24-well plates at a density of  $1.5 \times 10^5$

cells/well and cultured to reach 70–80% confluency. Cells were then serum starved (0.5% FBS) for 24h, pretreated with 17-AAG for 2h, and then stimulated with recombinant human TGF $\beta$  (20 ng/ml; R&D Systems) in the presence or absence of 17-AAG for 24h. After 24h of stimulation, cells were lysed in RLT lysis buffer supplemented with  $\beta$ -mercaptoethanol for RNA isolation and cDNA synthesis. Quantitative PCR analyzed ECM gene expression.

**Fibroblast and fibrocyte invasion and migration.** In vitro invasion and migration assays were performed using human or mouse primary lung-resident fibroblasts (CD45<sup>-</sup>Col1<sup>+</sup>) or fibrocytes (CD45<sup>+</sup>Col1<sup>-</sup>), isolated as described previously (1, 3). 96-well Image Lock plates (Essen Biosciences) were used for all experiments. Invasion assay plates were coated with BD matrigel (50  $\mu$ l/well; 100  $\mu$ g/ml in IMDM) and incubated at 37°C, 5% CO<sub>2</sub> for overnight. Day 2 wells were washed twice with media (0.5% FCS) (2x100  $\mu$ l/well). Lung-resident fibroblasts or fibrocytes (50k/well) were seeded and grown to form a confluent monolayer (37°C, 5% CO<sub>2</sub>, one day). Scratch wounds were made on Day 3 using a 96-well pin wound-maker according to the manufacturer instructions (Essen Biosciences, Ann Arbor, Michigan, USA). Plates were washed twice with media (0.5% FCS) (2x100  $\mu$ l/well). Matrigel containing 17-AAG or DMSO (50  $\mu$ l/well; 3 mg/ml) was added on top of the cell layer to fill in the wound area with matrigel and incubated at 37°C, 5% CO<sub>2</sub> for 30 min. Invasion through matrigel is used to mimic the invasion process through ECM that is similar in composition to lung basement membrane. Additional (100  $\mu$ l/well) media with or without 17-AAG was added and placed in IncuCyte ZOOM for height-content imaging. For migration assay, plates were precoated with fibronectin (50  $\mu$ l/well; 10  $\mu$ g/ml in PBS) for 2h. Lung resident fibroblasts or fibrocytes (50 k/well) were seeded and grown to form a confluent monolayer (37°C, 5% CO<sub>2</sub>, one day). Scratch wounds were made on Day 2, and plates were washed twice with media (0.5% FCS) (2x100  $\mu$ l/well). Migration was assessed in the presence and absence of 17-AAG or by genetic knockdown of Hsp90AA or Hsp90AB siRNA using the IncuCyte ZOOM height-content imaging system as previously described (3).

**Immunoprecipitation and Hsp90 ATPase assay.** Lung tissue lysates from control or TGF $\alpha$  mice were prepared in HEPES lysis buffer (20 mM HEPES, pH 7.3, 1 mM EDTA, 5 mM Mg Cl<sub>2</sub>, 100 mM KCl) supplemented with

protease inhibitors and cleared by centrifugation at 10,000 rpm. Pre-conjugated anti-Hsp90 protein-A/G agarose beads were incubated with 50  $\mu$ l of tissue lysates (tissue lysates were pre-cleared with 50  $\mu$ l of protein-A/G agarose beads; 50% slurry). The ATPase activity of the immunoprecipitated Hsp90 was measured by detection of free inorganic phosphate (Pi) release using a PiPer Phosphate Assay Kit (Molecular Probes, Cat# P22061). The assay measures an increase in absorption at 565 nm of an Amplex Red reagent, which is proportional to the amount of Pi in the sample, and activity of Hsp90 was represented as an increase in absorbance at 3h.

**Hsp90 affinity binding assay.** Primary fibroblasts cell lysates from control or TGF $\alpha$  mice were prepared in HEPES lysis buffer (20 mM HEPES, pH 7.3, 1 mM EDTA, 5 mM MgCl<sub>2</sub>, 100mM KCl) supplemented with protease inhibitors. The competitive binding assay was performed as described previously, with minor modifications (4). Protein lysates (50  $\mu$ g) were incubated with increasing concentrations of 17-AAG or without 17-AAG for 1h at 4°C, and then incubated with biotin-GM linked to BioMag streptavidin magnetic beads (Cat # 311711; Qiagen) for 1hr at 4°C. Tubes were placed on a magnetic rack, and the unbound supernatant was removed. The magnetic beads were then washed three times with lysis buffer containing protease inhibitor and once with PBS. Samples were eluted in LDS sample buffer containing DTT, a reducing agent. Beads along with LDS were incubated at 70°C for 10 min. Samples were then analyzed on LDS protein gels, and immunoblots were probed for Hsp90. Bands in the Western blots were quantified using the volume-integration function on Phosphor Imager software Image Quant 5.2 (Molecular Dynamics, Piscataway, NJ), and the percentage inhibition of binding of Hsp90 to the biotin-GM was calculated by assigning control as 100%.

**Immunofluorescence.** For the actin polymerization assay or PCNA immunostaining, lung-resident fibroblasts isolated from mouse or human primary lung-cell cultures were grown on glass coverslips overnight and treated with 17-AAG (1 $\mu$ M) or DMSO for 24h; then cells were fixed in 4% paraformaldehyde. Nonspecific protein binding was blocked with 3% BSA in PBS, followed by incubation with primary antibodies in blocking solution and subsequent incubation with secondary antibodies. Finally, the coverslips were washed and mounted on glass slides with Prolong gold DAPI. Confocal images were collected using a Nikon AIR-A1 laser-scanning confocal microscope (Melville, NY, USA). A z-stack of optical sections, 10  $\mu$ m in total thickness, was captured from

DMSO- or 17-AAG-treated coverslips, and five 3D images were obtained per condition. Imaris (version 7.2.0; Bitplane, South Windsor, CT, USA) was used for colocalization analysis for Hsp90 and actin. For quantitative analysis of PCNA, 7-8 random images were taken for each condition (DMSO or 17-AAG) with the 10X objective. Cell quantitation was performed using Metamorph imaging software. PCNA levels were represented as percent proliferating cells in a given condition. Representative images were taken with the 60X oil objective, and data were reported as  $\pm$  SEM of cell number for each experimental condition.

**Hsp90 small interfering RNA transfection.** Primary human or mouse lung-resident fibroblasts were transfected with Silencer Hsp90AA or Hsp90AB small interfering RNA (siRNA) (Cat # 4390771, Id # s67900 or s67899; Ambion) or silencer control siRNA (Cat # AM4611; Ambion) using the Lipofectamine 3000 Transfection kit (Invitrogen) according to the manufacturer's instructions. Primary lung-resident fibroblasts were separated from fibrocytes using anti-CD45 magnetic beads as described previously (1) and grown on 12-well plates to 90% confluence. Cells were transfected with siRNA using OptiMEM media containing no antibiotics. Transfected cells were harvested 72h post transfection and used for RNA isolation and gene-expression analysis.

**BrdU incorporation.** Primary lung-resident fibroblast proliferation was examined in the presence of 17-AAG or Hsp90AA or Hsp90AB siRNA using a colorimetric immunoassay based on BrdU incorporation using a BrdU Cell Proliferation Assay Kit (#6813, Cell Signaling Technology, Denver, USA) according to the manufacturer's instruction. In brief, CD45- Col+ primary resident fibroblasts (20,000 cells/well) were seeded in 96-well plates. Cells were incubated with different concentrations of 17-AAG (0.01, 0.05, 0.1, 0.5, and 1  $\mu$ M) for 24h or transfected with Hsp90 siRNA for 48h, then 10  $\mu$ l of 10X BrdU labeling solution was added in 100  $\mu$ l of media per well and cells were incubated for an additional 24h. Post 24h BrdU labeling, cells were fixed and denatured using kit components, and immunodetection was performed as per the protocol recommended by manufacturer. Absorbance was taken at 450 nm, and proliferation was calculated as fold difference in proliferation over control.

**RNA preparation and RT-PCR.** Total RNA was extracted using the RNAeasy Mini Kit (Qiagen Sciences, Valencia, CA, USA) as previously described (1). cDNA synthesis was carried out using SuperScript® III Reverse Transcriptase (Invitrogen). qRT-PCR assays were performed with the CFX384 Touch Real-Time PCR Detection

system (Bio-Rad, Hercules, California, USA). The relative quantities of mRNA for several genes were determined using iTaq™ universal SYBR green supermix (Bio-Rad). Target-gene transcripts in each sample were normalized to hypoxanthine guanine phosphoribosyl transferase or HPRT and expressed as a relative increase or decrease compared with control. All real-time primer sequences used are shown in Supplemental Tables 2 and 3.

**Western blot.** Purified lung resident fibroblasts (CD45<sup>-</sup>Col1<sup>+</sup>) were isolated as described, grown on 12-well plates to 90% confluence and treated with 17-AAG or DMSO for 48h. Cells were lysed in RIPA lysis buffer, and protein estimation was performed using the BCA method according to manufactures instructions (manufacturer information). Immunoblotting and quantification were performed using the volume-integration function of Phosphor Imager software Image Quant 5.2, as previously described (2). Primary antibodies and dilutions used are described in Supplemental Table 5, and the appropriate secondary antibodies conjugated with peroxidase (1:1000) were used for blot development.

#### **Supplemental figure legends:**

**Supplemental Figure S1.** 17-AAG attenuates migration and invasion. Primary Lung Fibroblast (CD45<sup>-</sup> Col1<sup>+</sup>) and fibrocytes (CD45<sup>+</sup> Col1<sup>+</sup>) were isolated from lung cultures of IPF lungs or TGF- $\alpha$  mice on Dox for 4wk. Scratch wound migration and invasion assay was performed in the presence and absence of 17-AAG (1 $\mu$ M) for 24h. **(A)** Quantitation of migration and invasion of fibroblasts isolated from lung cultures of TGF- $\alpha$  mice on Dox for 4wk and treated with vehicle of 17-AAG for 24h. **(B)** Quantitation of migration and invasion of fibrocytes isolated from lung cultures of IPF lungs and treated with vehicle of 17AAG for 24h. Data shown are mean  $\pm$  SEM values. \*p<0.05, \*\*p< 0.005, \*\*\*p<0.0005.

**Supplemental Figure S2.** Hsp90AA and HSP90AB isoform-specific knockdown using siRNA. Primary lung fibroblasts (CD45<sup>-</sup>Col1<sup>+</sup>) were isolated from lung cultures of TGF- $\alpha$  mice on Dox for 4wk using anti-CD45 magnetic beads and transfected with either control- or Hsp90 isoform-specific siRNA for 72h. **(A, B)** Quantitation of Hsp90AA and Hsp90AB gene transcripts relative to Hprt in the lung fibroblasts of treated with control,

Hsp90AA or Hsp90AB-specific siRNA for 72h. Data represents two independent experiments with similar results. Data shown are mean  $\pm$  SEM values (N = 3-6/group). \*\*p<0.005 and \*\*\*\*p<0.00005.

**Supplemental Figure S3.** Limited or no effect of 17-AAG on genes involved in fibroblast migration. Primary lung fibroblasts (CD45<sup>-</sup>Col1<sup>+</sup>) were isolated from lung cultures of TGF- $\alpha$  mice on Dox for 4wk using anti-CD45 magnetic beads and treated with either vehicle or 17-AAG for 24h. The levels of Mmp2, Mmp9, and Timp2 gene transcripts relative to Hprt were quantified using qRT-PCR. Data is a representative of two independent experiments with similar results. Data shown are mean  $\pm$  SEM values (N = 6/group).

**Supplemental Figure S4.** The effect of HSP90AA Knock down on Hsp90-driven genes involved in fibroproliferation in IPF. Primary lung fibroblasts (CD45<sup>-</sup>Col1<sup>+</sup>) were isolated from lung cultures of TGF- $\alpha$  mice on Dox for 4wk using anti-CD45 magnetic beads and transfected with either control- or Hsp90AA isoform-specific siRNA for 72h. The levels of Cdk4, Igf1, Mycn and Sphk1 gene transcripts relative to Hprt are quantified using qRT-PCR. Data is a representative of two independent experiments with similar results. Data shown are mean  $\pm$  SEM values (N = 3-6/group).

**Supplemental Figure S5.** The effect of HSP90AA Knock down on Hsp90-driven ECM genes in IPF. Primary lung fibroblasts (CD45<sup>-</sup>Col1<sup>+</sup>) were isolated from lung cultures of TGF- $\alpha$  mice on Dox for 4wk using anti-CD45 magnetic beads and transfected with either control- or Hsp90AA isoform-specific siRNA for 72 hr. The levels of  $\alpha$ SMA, Col1 $\alpha$ , Col5 $\alpha$  and FN1 gene transcripts relative to HPRT were quantified using qRT-PCR. Data is a representative of two independent experiments with similar results. Data shown are mean  $\pm$  SEM (N = 3-6/group).

**Supplemental Figure S6.** The progressive expansion of fibrotic lesions during TGF $\alpha$ -induced pulmonary fibrosis. (A) Images of Masson's trichrome stained lung sections from control and TGF $\alpha$  mice on Dox for 3 or 6 wk. Scale bar, 200 $\mu$ m. Images are representative of each group with (N = 6-10/group). (B) Quantitation of the right lung weight of control and TGF $\alpha$  mice on Dox for 3 or 6 wk (N = 6-10/group). (C) Quantitation of total lung hydroxyproline levels in control and TGF $\alpha$  mice on Dox for 3 or 6 wk (N = 6-10/group). Statistical significance was measured using one-way ANNOVA with Sidak's multiple comparison test for all the experiments. \*\*\*p<0.0005 and \*\*\*\*p<0.00005.

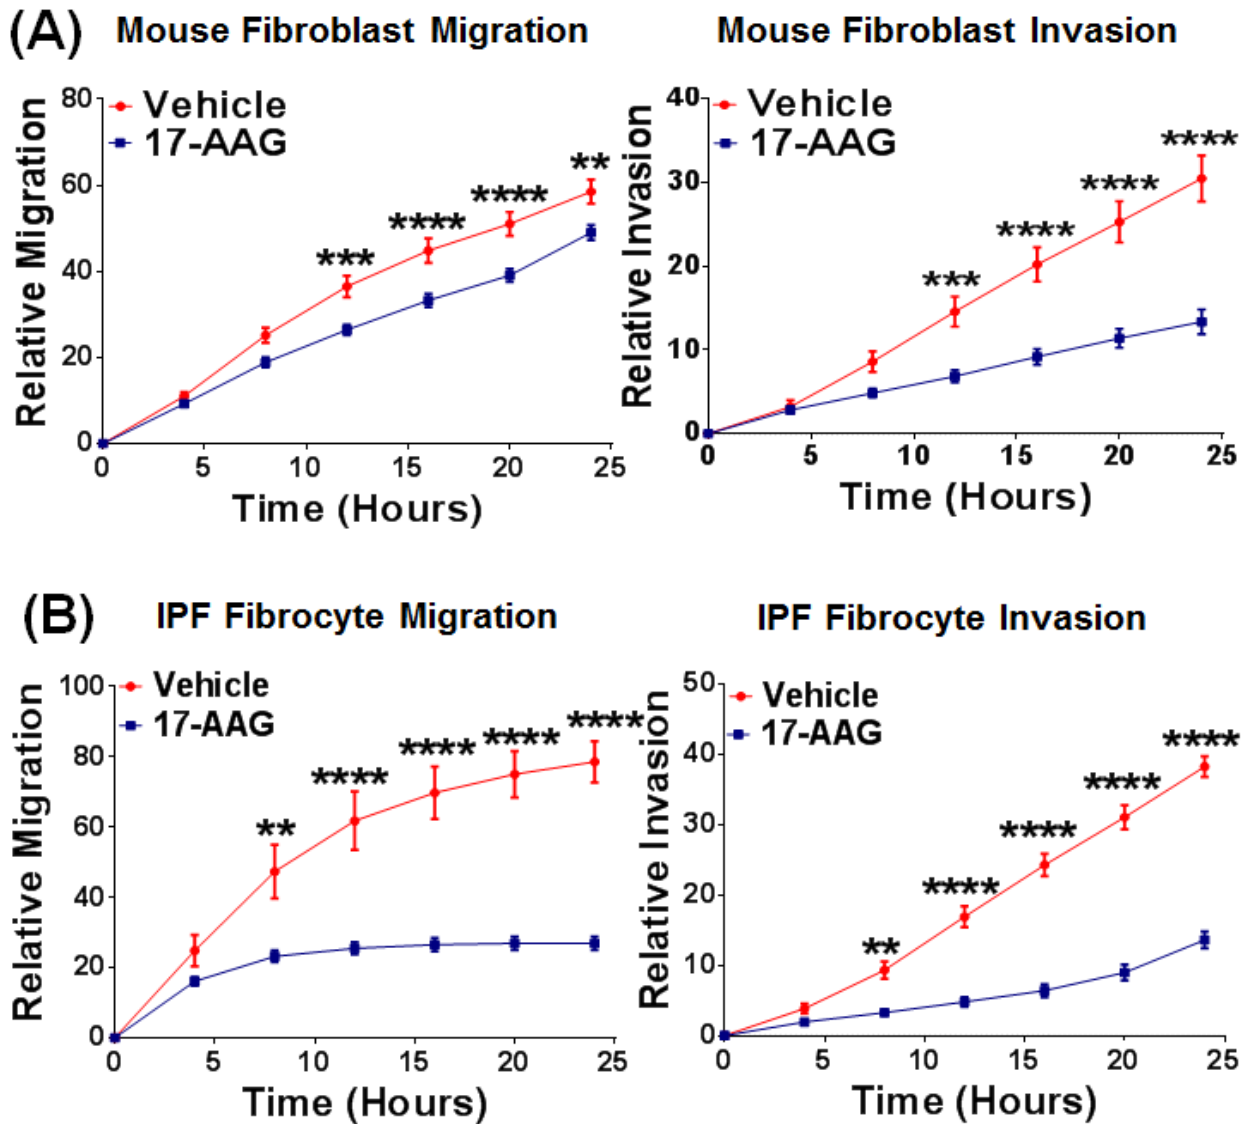



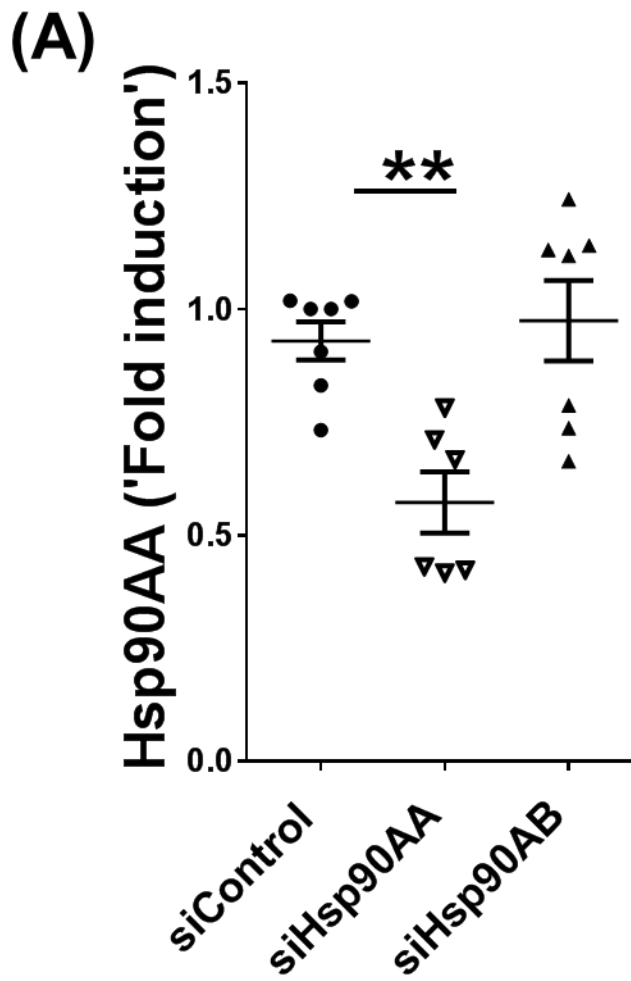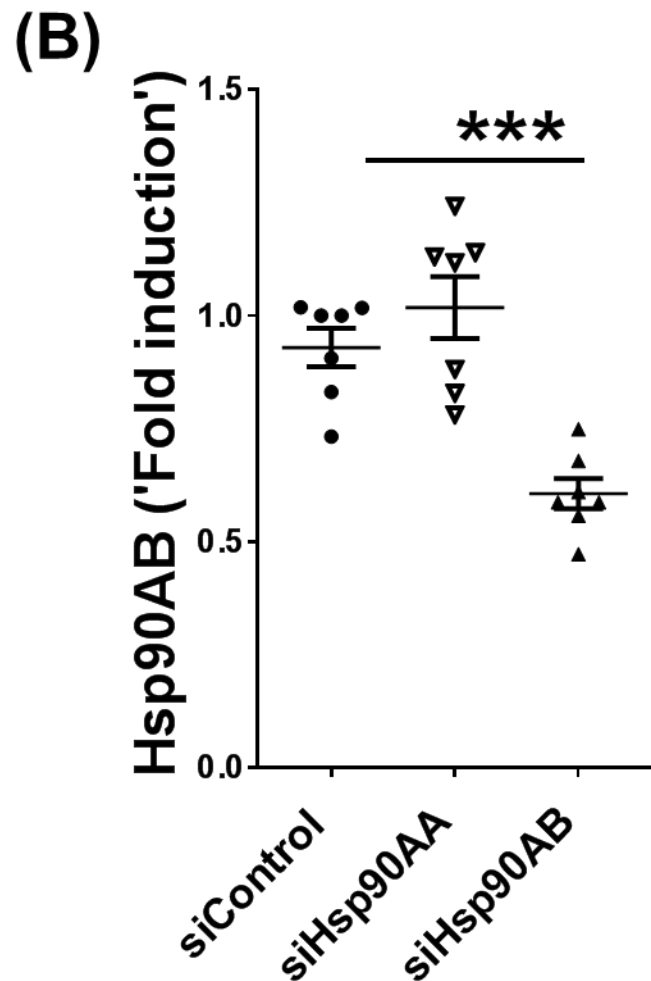

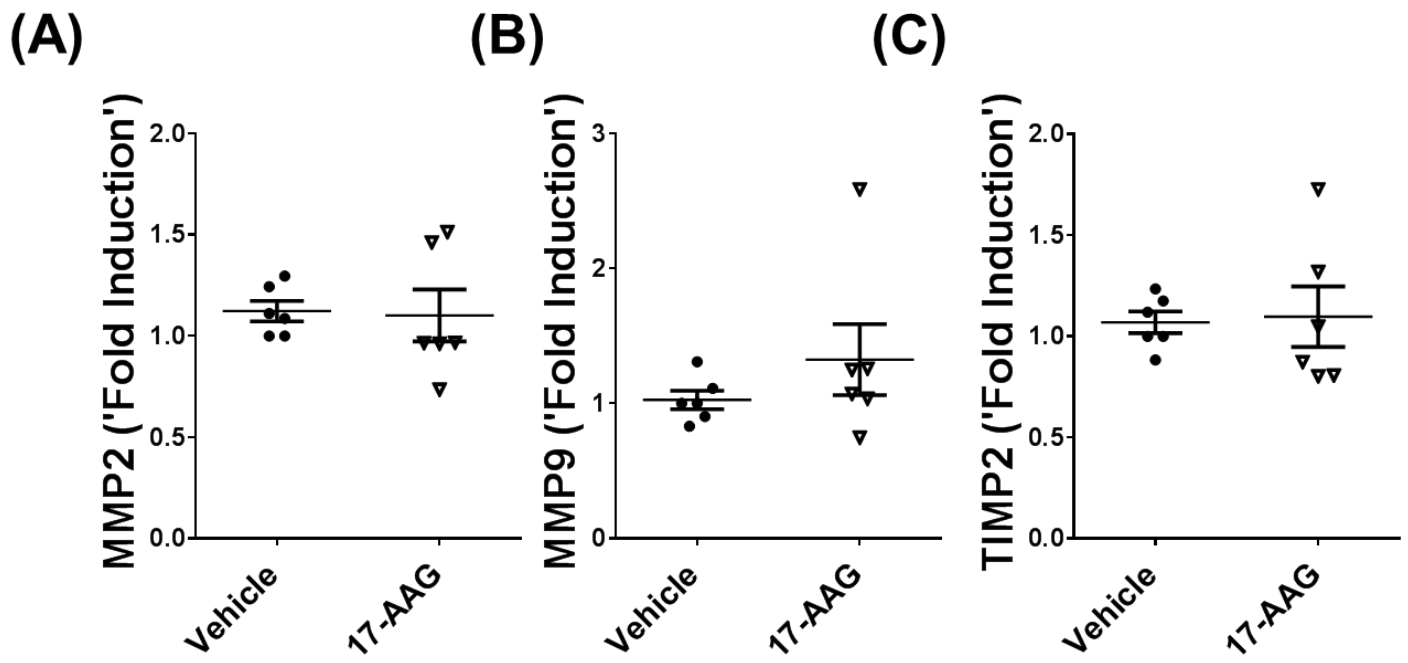

Supplemental Figure S4

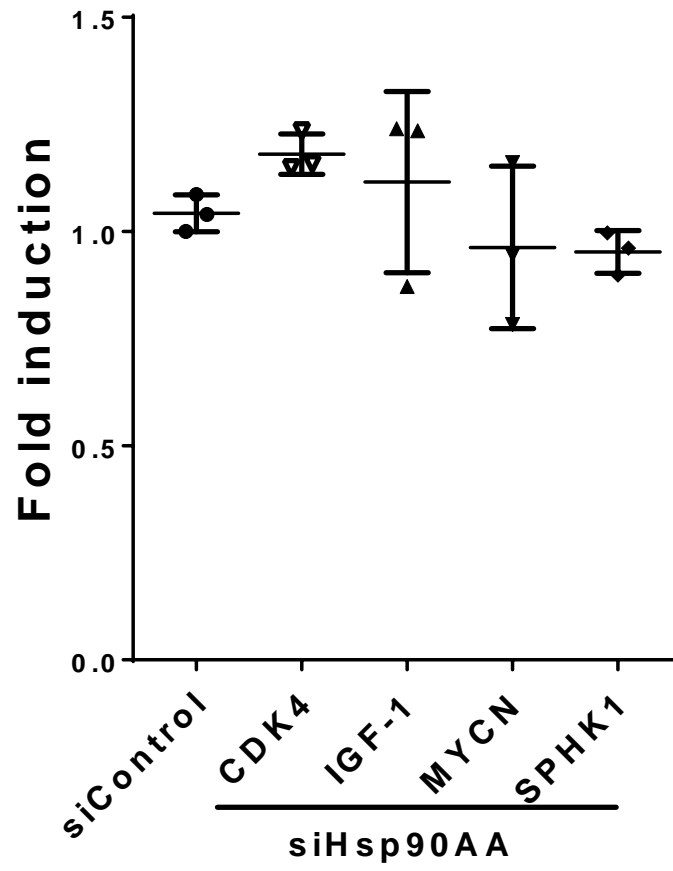

Supplemental Figure S5

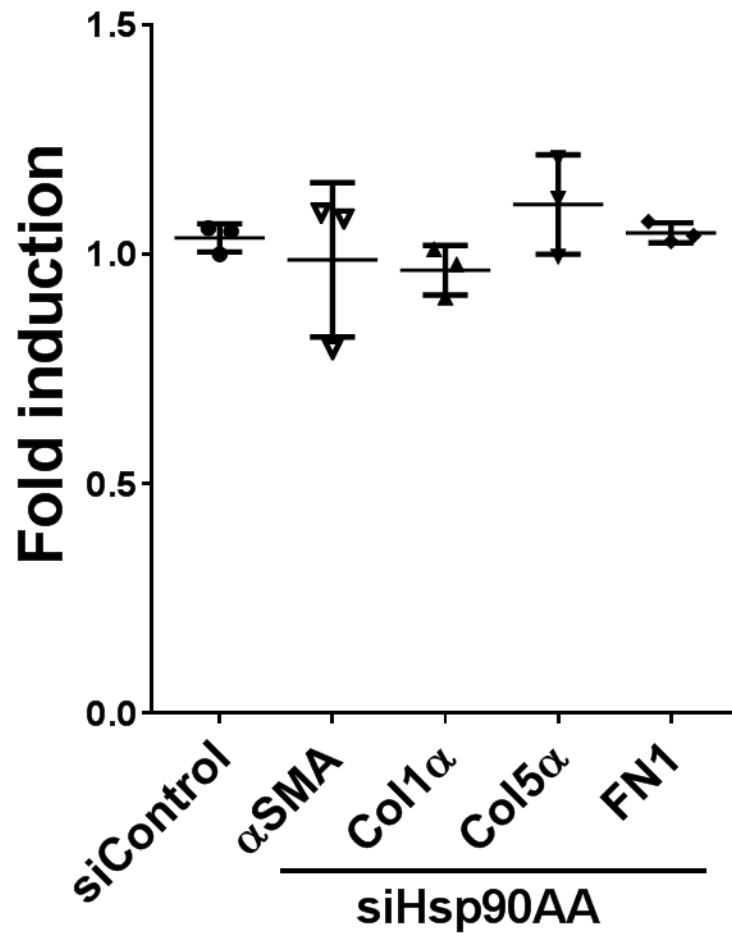

Supplemental Figure S6

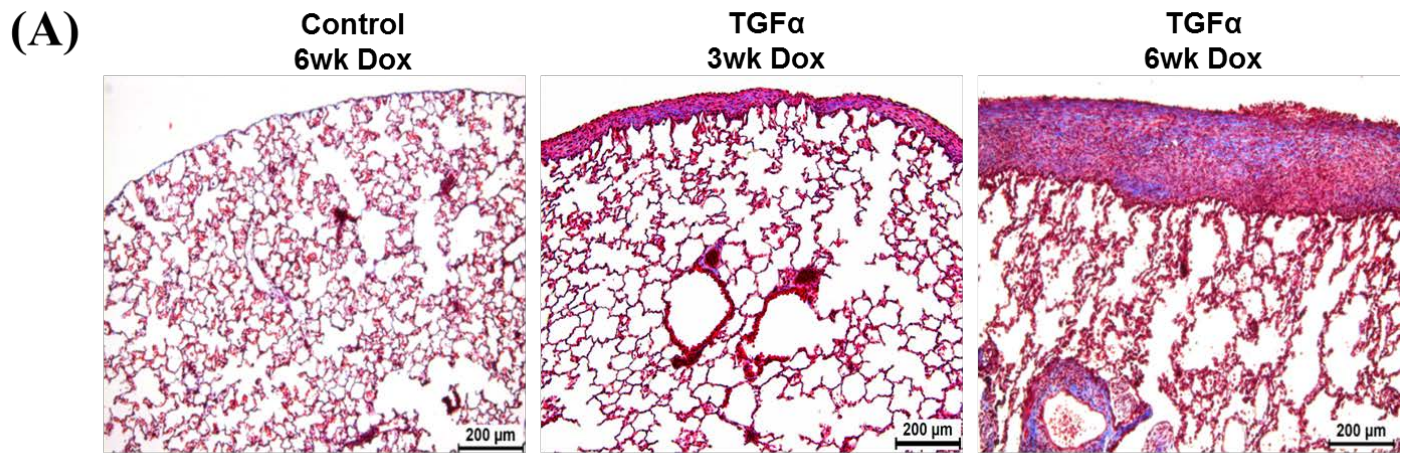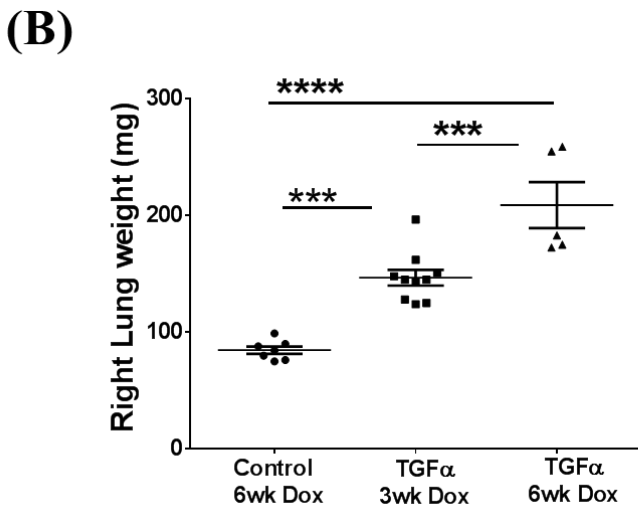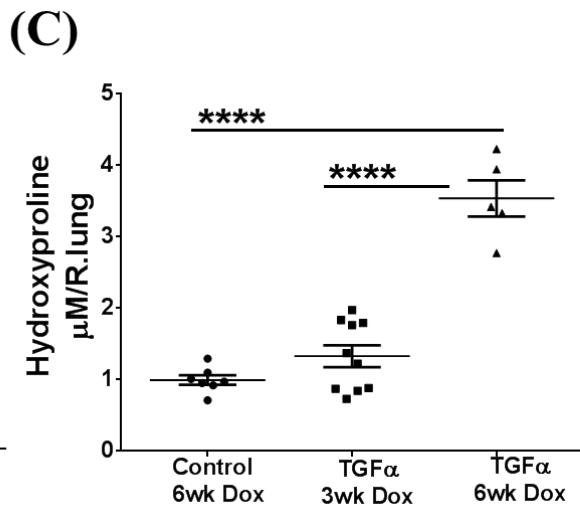

**Supplemental Table 1.** The list of IPF genes regulated by 17-AAG.

| <b>Genes Upregulated in IPF and Downregulated by 17-AAG</b> | <b>Genes Downregulated in IPF and Upregulated by 17-AAG</b> |
|-------------------------------------------------------------|-------------------------------------------------------------|
| <b>Gene Symbol</b>                                          | <b>Gene Symbol</b>                                          |
| ABCC3                                                       | ABCC6                                                       |
| ADORA2B                                                     | ABHD6                                                       |
| AEN                                                         | ABL1                                                        |
| AK4                                                         | ACSM3                                                       |
| ALDH1A3                                                     | ACYP1                                                       |
| ANK2                                                        | ADD1                                                        |
| AQP3                                                        | ADRB2                                                       |
| ARL4C                                                       | AGTR1                                                       |
| ATP10B                                                      | AKAP9                                                       |
| BASP1                                                       | AKR1C1                                                      |
| BCL2A1                                                      | ALDH6A1                                                     |
| BCL3                                                        | ANG                                                         |
| BDKRB2                                                      | ARHGAP29                                                    |
| BIRC3                                                       | ARHGEF10                                                    |
| CCL2                                                        | ASL                                                         |
| CCL20                                                       | B3GNT2                                                      |
| CD24                                                        | BCL2L2                                                      |
| CD28                                                        | CALCOCO2                                                    |
| CDCP1                                                       | CCNB1IP1                                                    |
| CDKN1A                                                      | CDK19                                                       |
| CEMP                                                        | CERS2                                                       |
| CFI                                                         | CES1                                                        |
| COCH                                                        | CIT                                                         |
| COL14A1                                                     | CLDN18                                                      |
| COL17A1                                                     | CLIC3                                                       |
| COL5A2                                                      | COBLL1                                                      |
| COL6A3                                                      | CYP3A5                                                      |
| CROT                                                        | DAPK1                                                       |
| CST1                                                        | DENND3                                                      |
| CTSG                                                        | DNM2                                                        |
| CTSK                                                        | DUSP8                                                       |
| CXCL12                                                      | EFNB2                                                       |
| CXCL13                                                      | EGFR                                                        |
| CXCL8                                                       | EMP2                                                        |

|          |          |
|----------|----------|
| DACT1    | ENOSF1   |
| DFNA5    | ESRP2    |
| DIO2     | FAH      |
| DIRAS3   | FAM63A   |
| DNM1     | FASTKD1  |
| DUSP4    | FGGY     |
| DUSP5    | FLVCR2   |
| DZIP1    | GFOD1    |
| EGR3     | GGT1     |
| ELF3     | GLO1     |
| EREG     | GLUL     |
| FAM102A  | GNAQ     |
| FAM69A   | GPC3     |
| FERMT1   | GPM6B    |
| FHL2     | GPX3     |
| FOSB     | GSTM1    |
| FOSL1    | GTF3C3   |
| FUT8     | HBS1L    |
| GALNT6   | HIST1H4A |
| GATM     | HMBOX1   |
| GCNT3    | HOXA5    |
| GDF15    | HTATIP2  |
| GEM      | IL1R2    |
| GJB3     | IL6ST    |
| GM2A     | IRS2     |
| GNB5     | IVD      |
| GNL3     | KAT6B    |
| HIF1A    | KIAA1109 |
| HIST1H4J | KIF1C    |
| HLA-DPB1 | KLF9     |
| HOMER3   | KLHL24   |
| HRH1     | LAMA3    |
| IER3     | LAMA5    |
| IGF1     | MAN2A2   |
| IL13RA2  | MAP2K5   |
| IL6      | MAPK13   |
| ITGA7    | MAPK14   |
| ITGB4    | MAPT     |
| JUNB     | MAVS     |

|          |           |
|----------|-----------|
| KCNMA1   | MFGE8     |
| KCNN4    | MKL2      |
| KRT14    | MKLN1     |
| KRT6B    | MT1E      |
| KRT81    | MT1H      |
| LCN2     | NDUFA10   |
| LIF      | NEDD4L    |
| MEOX1    | NPR3      |
| MEX3C    | OLFML2A   |
| MMP11    | PACSIN3   |
| MMP7     | PGC       |
| MYC      | PIR       |
| NAMPT    | PLCE1     |
| NT5E     | PPP1R13B  |
| NTS      | PPP3R1    |
| OSBPL10  | PRKAG2    |
| PCSK1N   | PRKCD     |
| PDE1A    | PRRG4     |
| PFKP     | PXMP4     |
| PHLDA1   | RAB11FIP1 |
| PHLDA2   | RAB11FIP2 |
| PHTF2    | RAB17     |
| PLAU     | RAD21     |
| PLAUR    | RAPGEF2   |
| PLEK2    | RASSF7    |
| PMEPA1   | RDX       |
| POF1B    | REPS2     |
| PRKACB   | RHOT1     |
| PRR7     | SACM1L    |
| PRSS2    | SAP30     |
| PSD3     | SCEL      |
| PTGER4   | SERPINA3  |
| PTGS2    | SESN1     |
| RAB3B    | SH3BP5    |
| RND3     | SHANK2    |
| RNF19B   | SLC26A2   |
| SDC1     | SLC27A3   |
| SEMA3C   | SLC35D2   |
| SERPINB5 | SLCO4A1   |



|          |          |
|----------|----------|
| SFN      | SMAGP    |
| SLC7A5   | SMARCA5  |
| SLC9A3R1 | SORBS2   |
| SOCS3    | SORT1    |
| SPHK1    | SPTBN1   |
| SPRR1A   | SULT1A1  |
| SPRR1B   | SYF2     |
| STMN2    | TACC2    |
| STX1A    | TAOK2    |
| TFPI2    | TGFBR2   |
| TGFB2    | TIMP3    |
| TGFBI    | TLR4     |
| TIMP1    | TMEM100  |
| TMEM132A | TMEM106C |
| TNFRSF21 | TMEM97   |
| TPBG     | TNS3     |
| TRIB1    | TOM1L1   |
| TRIM29   | TSPAN13  |
| TSPAN5   | TTC39A   |
| TUBB2B   | VAMP3    |
| TUBB3    | VPS13D   |
| UCHL1    | WASF3    |
| ZFP36    | WFS1     |
|          | YEATS2   |
|          | ZHX3     |
|          | ZNF185   |
|          | ZNF589   |
|          | ZNF75D   |

**Supplemental Table 2.** Sequences of gene-specific primers used for quantitative RT-PCR in murine samples.

| <b>Gene</b>    | <b>Forward</b>              | <b>Reverse</b>                |
|----------------|-----------------------------|-------------------------------|
| mHprt          | GCCCTTGACTATAATGAGTACTTCAGG | TTCAACTTGCGCTCATCTTAGG        |
| mIl-10         | CAGAGCCACATGCTCCTAGA        | GTCCAGCTGGTCCTTTGTTT          |
| mCcr5          | GAGACATCCGTTCCCCCTAC        | GTCGGAAGTACCCTTGAAA           |
| mCd44          | CTCCTTCTTTATCCGGAGCAC       | TGGCTTTTTGAGTGCACAGT          |
| mCol1a1        | AGACATGTTTCAGCTTTGTGGAC     | GCAGCTGACTTCAGGGATG           |
| mCol5a         | CTACATCCGTGCCCTGGT          | CCAGCACCGTCTTCTGGTAG          |
| mFn1           | CGGAGAGAGTGCCCTACTA         | CGATATTGGTGAATCGCAGA          |
| m $\alpha$ Sma | TGACGCTGAAGTATCCGATAGA      | CGAAGCTCGTTATAGAAAGAGTGG      |
| mMmp-12        | AATGCTGCAGCCCAAGGAAT        | CTGGGCAACTGGACAACCTCAACTC     |
| mHas2          | GGCGGAGGACGAGTCTATG         | ACACATAGAAACCTCTCACAATGC      |
| mTimp1         | GCAAAGAGCTTTCTCAAAGACC      | AGGGATAGATAAACAGGGAAACAC<br>T |
| mCcl3          | TGCCCTTGCTGTTCTTCTCT        | GTGGAATCTTCCGGCTGTAG          |
| mCcl20         | GGTACTGCTGGCTCACCTCT        | TGTACGAGAGGCAACAGTCG          |
| mCdk4          | AGAGCTCTTAGCCGAGCGTA        | TTCAGCCACGGGTTTCATATC         |
| mIgf1          | TCGGCCTCATAGTACCCACT        | ACGACATGATGTGTATCTTTATTGC     |
| mMycn          | AGCACCTCCGGAGAGGATAC        | CCACATCGATTTCCCTCCTCT         |
| mSphk1         | ACAGTGGGCACCTTCTTTC         | CTTCTGCACCAGTGTAGAGGC         |
| mHsp90AA       | GTCTCGTGCGTGTTCAATCA        | CATTAAGTGGGCAATTTCTGC         |
| mHsp90AB       | TACTCGGCTTTCCCGTCA          | GCCTGAAAGGCAAAGGTCT           |
| mMmp2          | GGTGCTCCACCACATACTCAACT     | CCCATGGTAAACAAGGCTTC          |
| mMmp9          | ACGACATAGACGGCATCCA         | GCTGTGGTTCAGTTGTGGTG          |
| mTimp2         | CGTTTTGCAATGCAGACGTA        | GGAATCCACCTCCTTCTCG           |

**Supplemental Table 3.** Sequences of gene-specific primers used for quantitative RT-PCR in human samples.

| <b>Gene</b>      | <b>Forward</b>          | <b>Reverse</b>           |
|------------------|-------------------------|--------------------------|
| h $\beta$ -actin | CCAACCGCGAGAAGATGA      | CCAGAGGGCGTACAGGGATAG    |
| hColla           | GGGATTCCCTGGACCTAAAG    | GGAACACCTCGCTCTCCA       |
| hFN1             | CTGGCCGAAAATACATTGTAAG  | CCACAGTCGGGTCAGGAG       |
| hCol5a           | CCTGGATGAGGAGGTGTTG     | CGGTGGTCCGAGACAAAG       |
| hCD44            | CAACAACACAAATGGCTGGT    | CTGAGGTGTCTGTCTCTTTCATCT |
| hCCR5            | GCCTCTGAATATGAACGGTGA   | ACATTTCCCTTCGTTGCTTC     |
| hMMP-12          | AGTTTTGATGCTGTCACCTACCG | CACTGGTCTTTGGTCTCTCAGAA  |
| hCDK4            | GTGCAGTCGGTGGTACCTG     | TTCGCTTGTGTGGGTTAAAA     |
| hIGF1            | TGTGGAGACAGGGGCTTTTA    | ATCCACGATGCCTGTCTGA      |
| hSPHK1           | TGAACCATTATGCTGGATATGA  | TGTGCAGAGACAGCAGGTTC     |

**Supplemental Table 4.** Antibodies used for Immunostainings

| <b>Antibody</b> | <b>Dilution</b> | <b>Catlog#.</b> | <b>Company</b>            |
|-----------------|-----------------|-----------------|---------------------------|
| HSP90           | 1:100           | SC-7947         | Santa Cruz Biotechnology  |
| Vimentin        | 1:500           | ab137321        | Abcam                     |
| PCNA            | 1:2000          | 2586S           | Cell signaling technology |
| Phalloidin-488  | 1:1000          | 12935S          | Cell signaling technology |
| $\alpha$ SMA    | 1:20000         | A5228           | Sigma                     |
| Ki67            | 1:400           | 12202           | Cell signaling technology |

**Supplemental Table 5.** Antibodies used for Western blot

| <b>Antibody</b> | <b>Dilution</b> | <b>Catlog#.</b> | <b>Company</b>            |
|-----------------|-----------------|-----------------|---------------------------|
| $\alpha$ SMA    | 1:20000         | A5228           | Sigma                     |
| FN1             | 1:500           | SC-9068         | Santa Cruz Biotechnology  |
| FAK             | 1:1000          | 3285S           | Cell signaling technology |
| pFAK            | 1:1000          | 3281S           | Cell signaling technology |

|        |        |               |                           |
|--------|--------|---------------|---------------------------|
| CDC42  | 1:1000 | 2466P         | Cell signaling technology |
| RhoA   | 1:1000 | 2117P         | Cell signaling technology |
| ERK    | 1:1000 | SC-94         | Santa Cruz Biotechnology  |
| pERK   | 1:1000 | SC-7383       | Santa Cruz Biotechnology  |
| HSP90* | 1:1000 | ADI-SPA-845-F | Enzo life sciences        |
| GAPDH  | 1:5000 | A300-641      | Bethyl laboratories       |

## References

1. Madala SK, Edukulla R, Schmidt S, Davidson C, Ikegami M, Hardie WD. Bone marrow-derived stromal cells are invasive and hyperproliferative and alter transforming growth factor-alpha-induced pulmonary fibrosis. *Am J Respir Cell Mol Biol* 2014; 50: 777-786.
2. Sontake V, Shanmukhappa SK, DiPasquale BA, Reddy GB, Medvedovic M, Hardie WD, White ES, Madala SK. Fibrocytes Regulate Wilms Tumor 1-Positive Cell Accumulation in Severe Fibrotic Lung Disease. *J Immunol* 2015; 195: 3978-3991.
3. Madala SK, Sontake V, Edukulla R, Davidson CR, Schmidt S, Hardie WD. Unique and Redundant Functions of P70S6K Isoforms Regulate Mesenchymal Cell Proliferation and Migration in Pulmonary Fibrosis. *Am J Respir Cell Mol Biol* 2016.
4. Kamal A, Thao L, Sensintaffar J, Zhang L, Boehm MF, Fritz LC, Burrows FJ. A high-affinity conformation of Hsp90 confers tumour selectivity on Hsp90 inhibitors. *Nature* 2003; 425: 407-410.
